# Supplementary material for: Human metapneumovirus prevalence and patterns of subgroup persistence identified through surveillance of pediatric pneumonia hospital admissions in coastal Kenya, 2007–2016
Source: PubMed Central journal article supplement (PMC6716807; doi:10.1186/s12879-019-4381-9), 2019-08-30

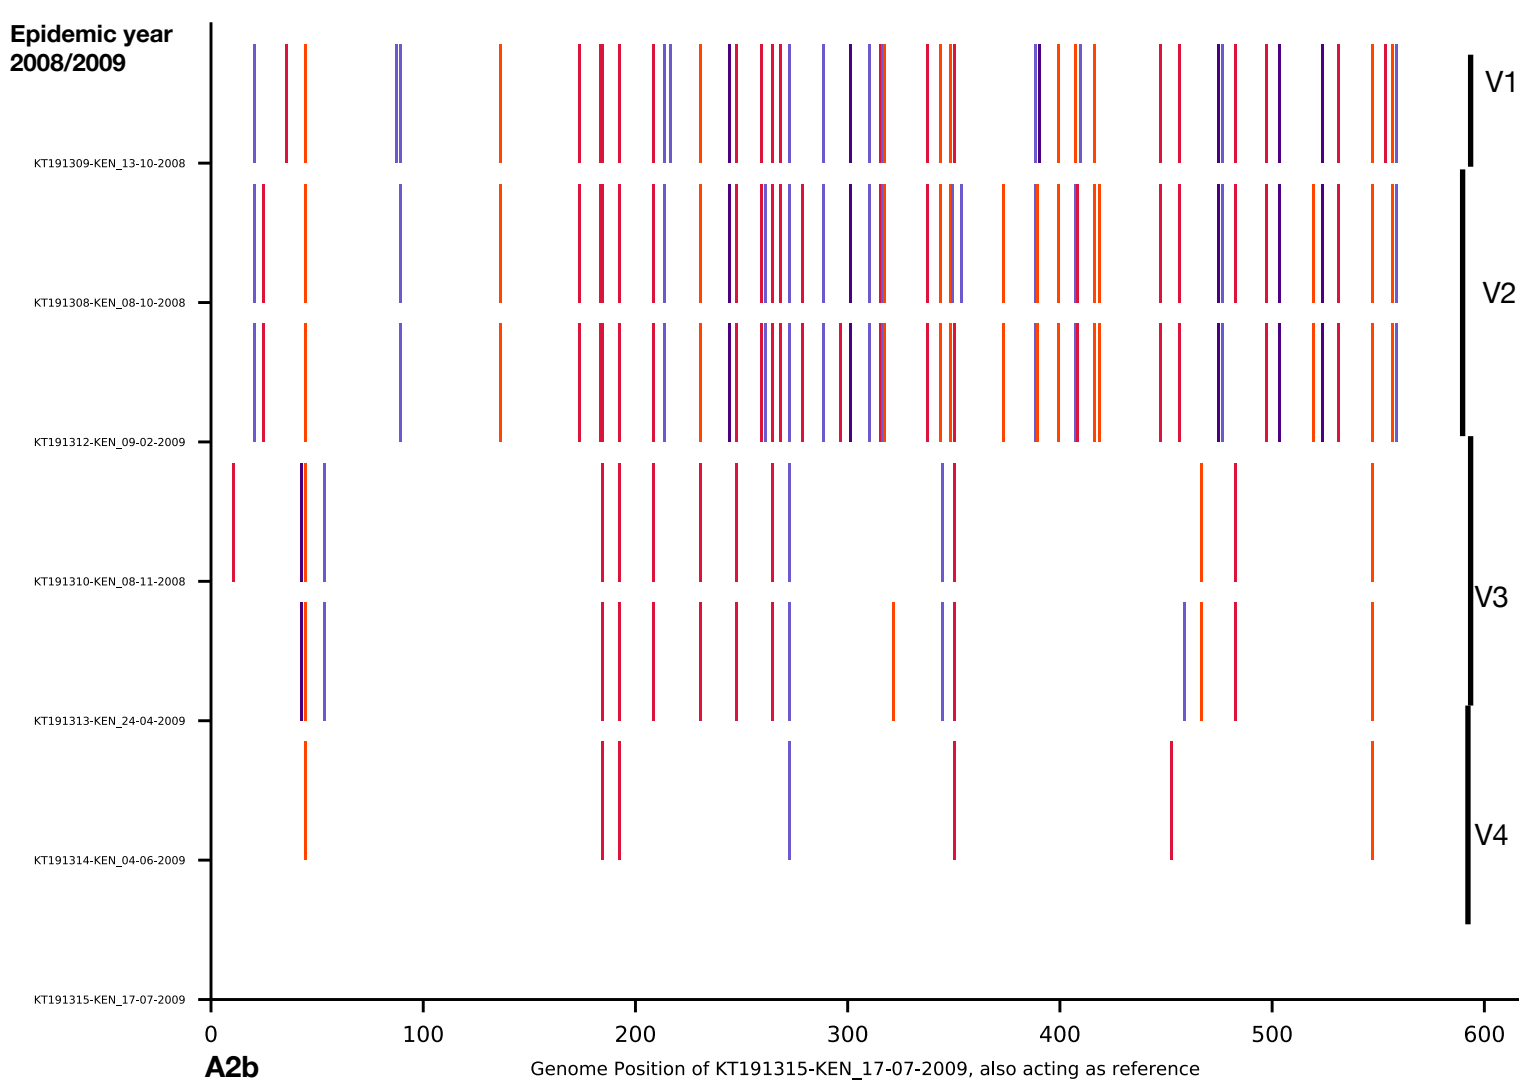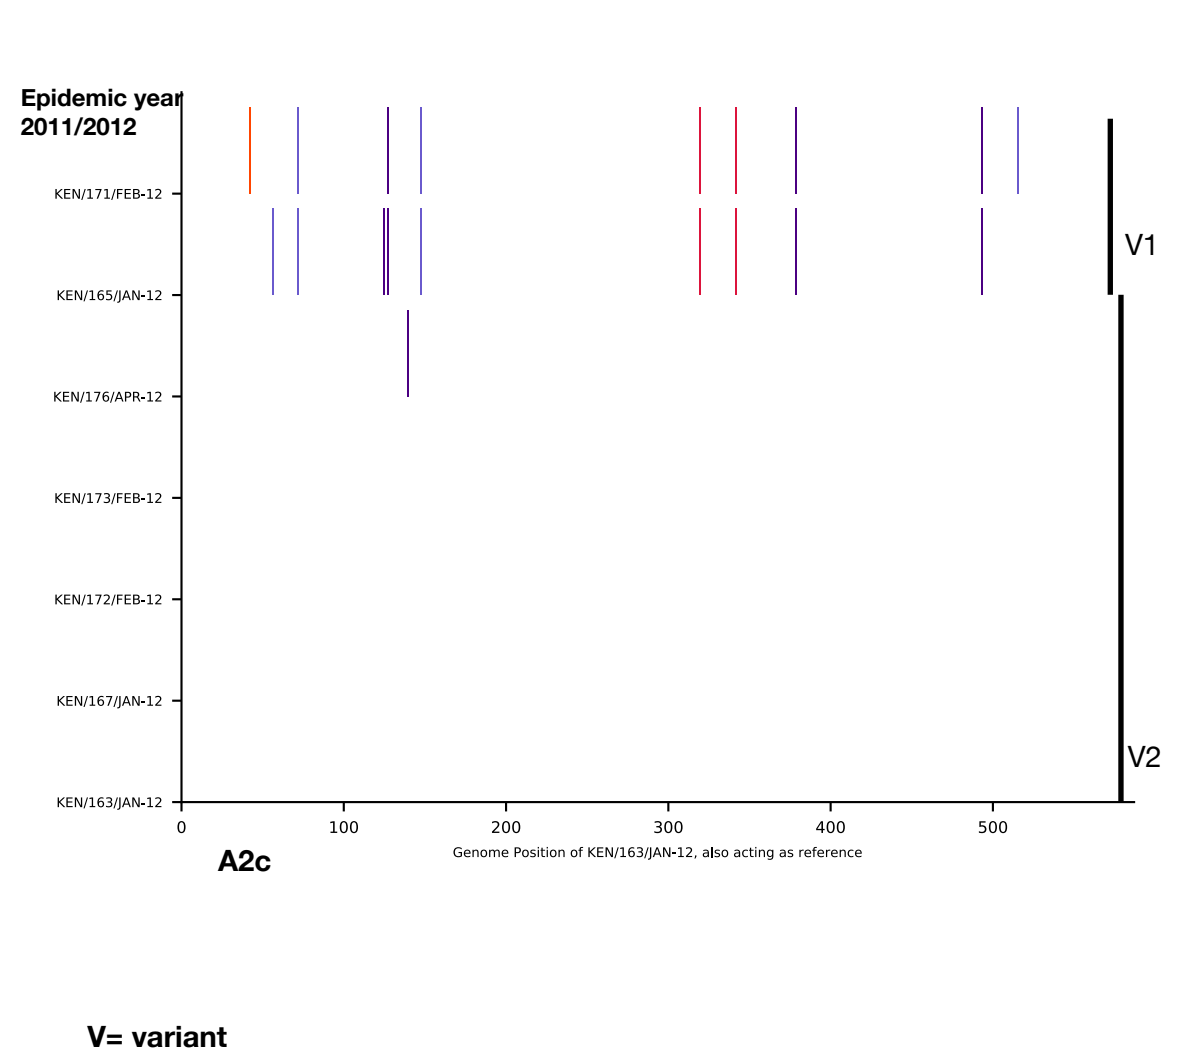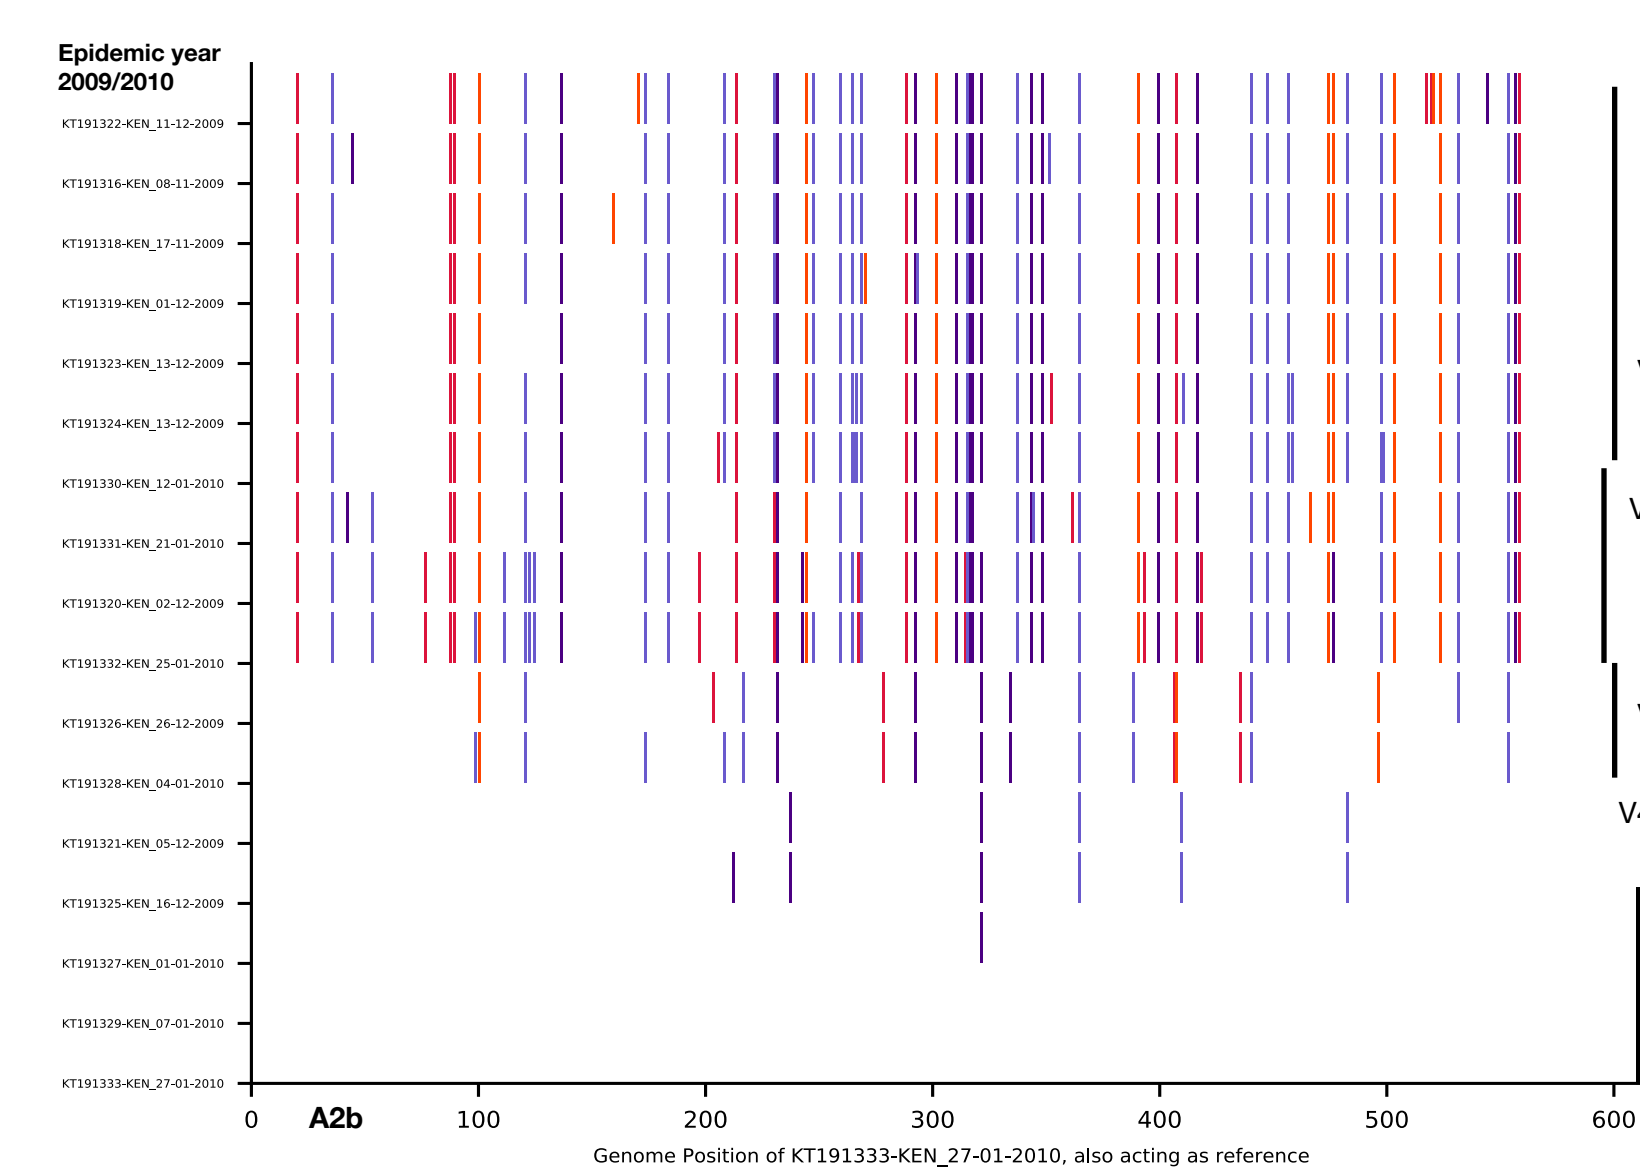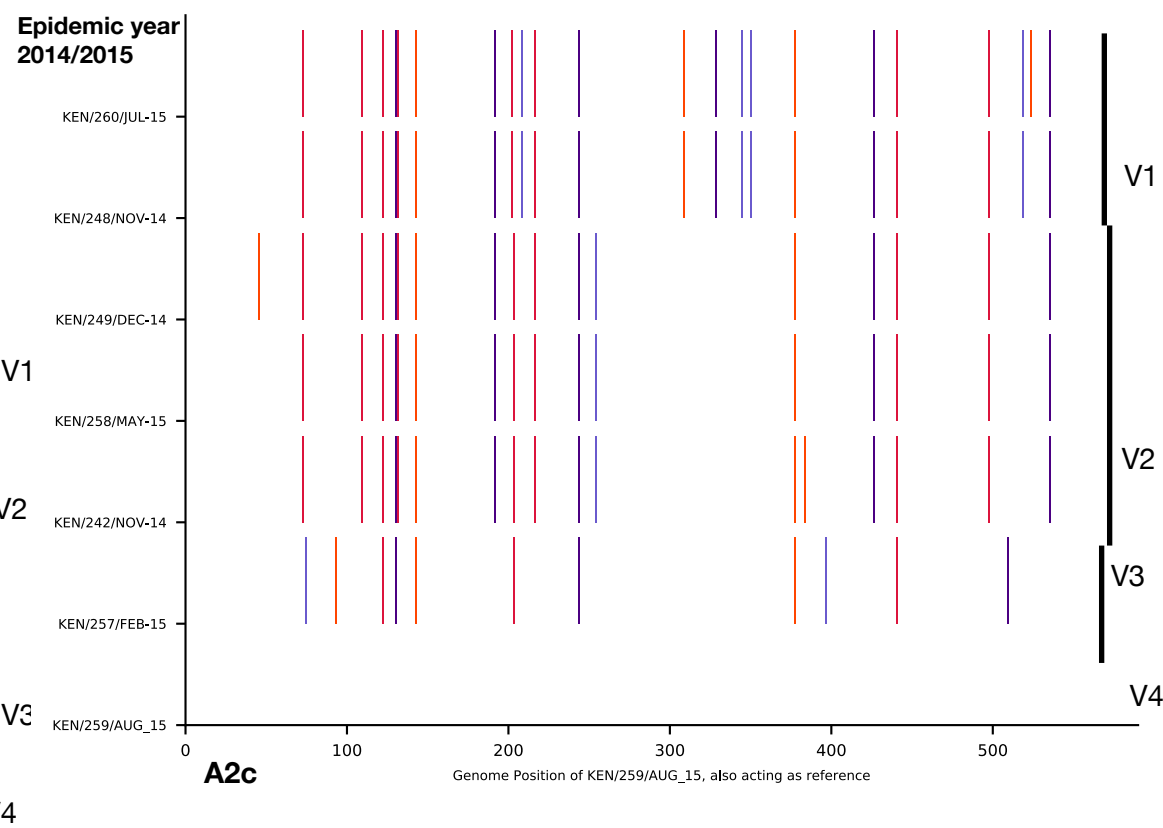

Supplement: 12879_2019_4381_MOESM4_ESM.pdf [file 12879_2019_4381_MOESM4_ESM.pdf]
