# Supplementary material for: Human metapneumovirus prevalence and patterns of subgroup persistence identified through surveillance of pediatric pneumonia hospital admissions in coastal Kenya, 2007–2016
Source: PubMed Central journal article supplement (PMC6716807; doi:10.1186/s12879-019-4381-9), 2019-08-30

**Epidemic year  
2013/2014**

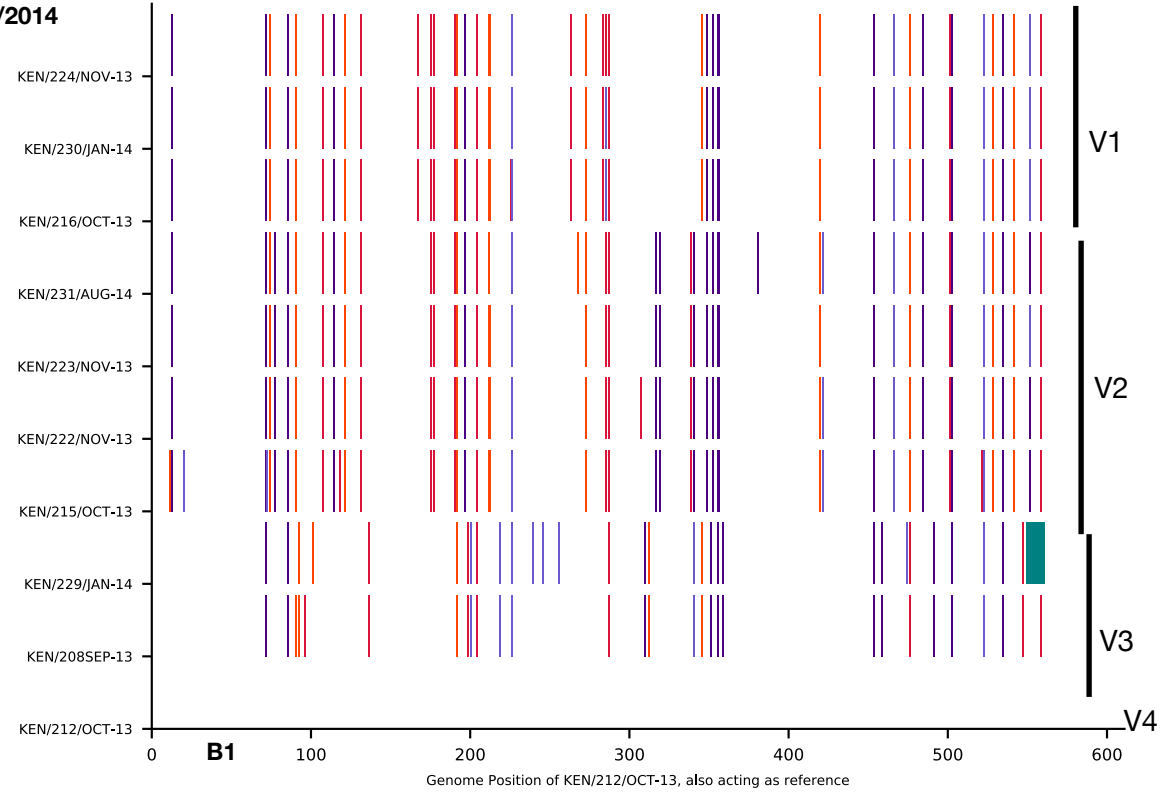

**Epidemic year  
2014/2015**

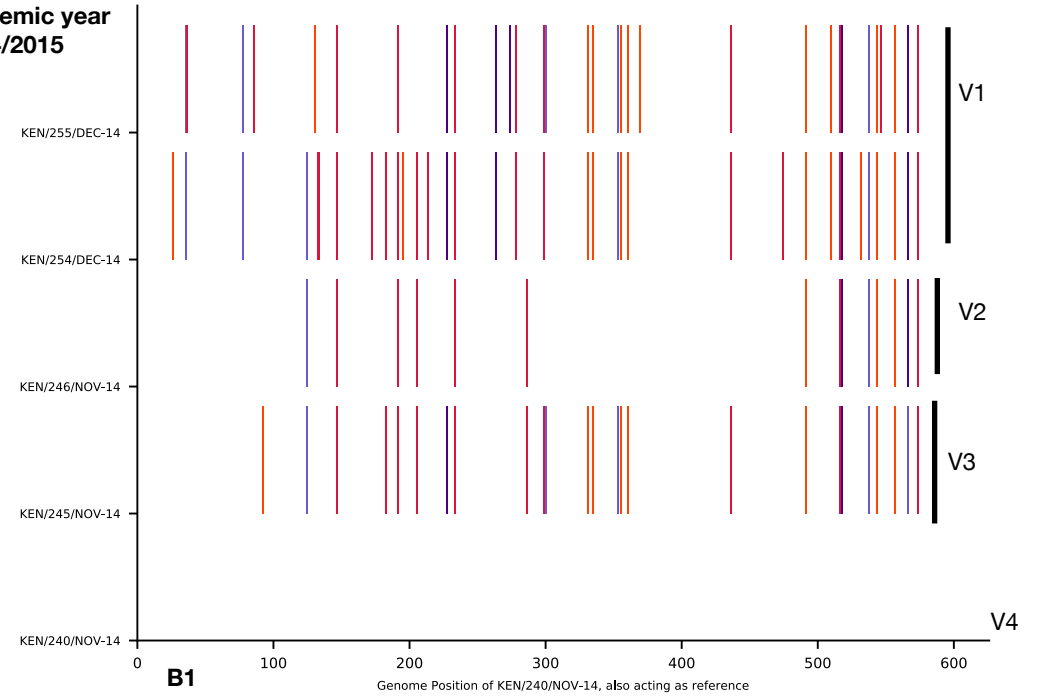

**V= variant**

**Epidemic year  
2011/2012**

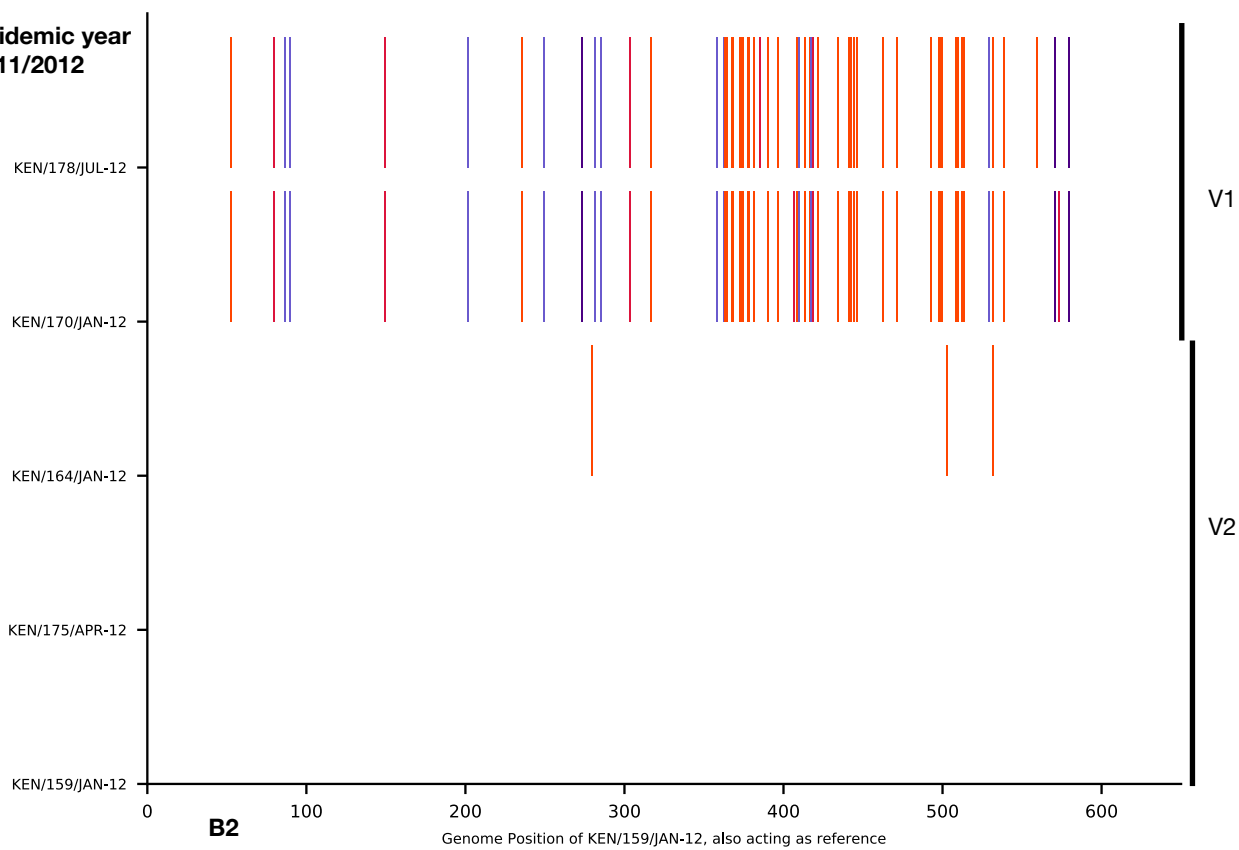

**Epidemic year  
2013/2014**

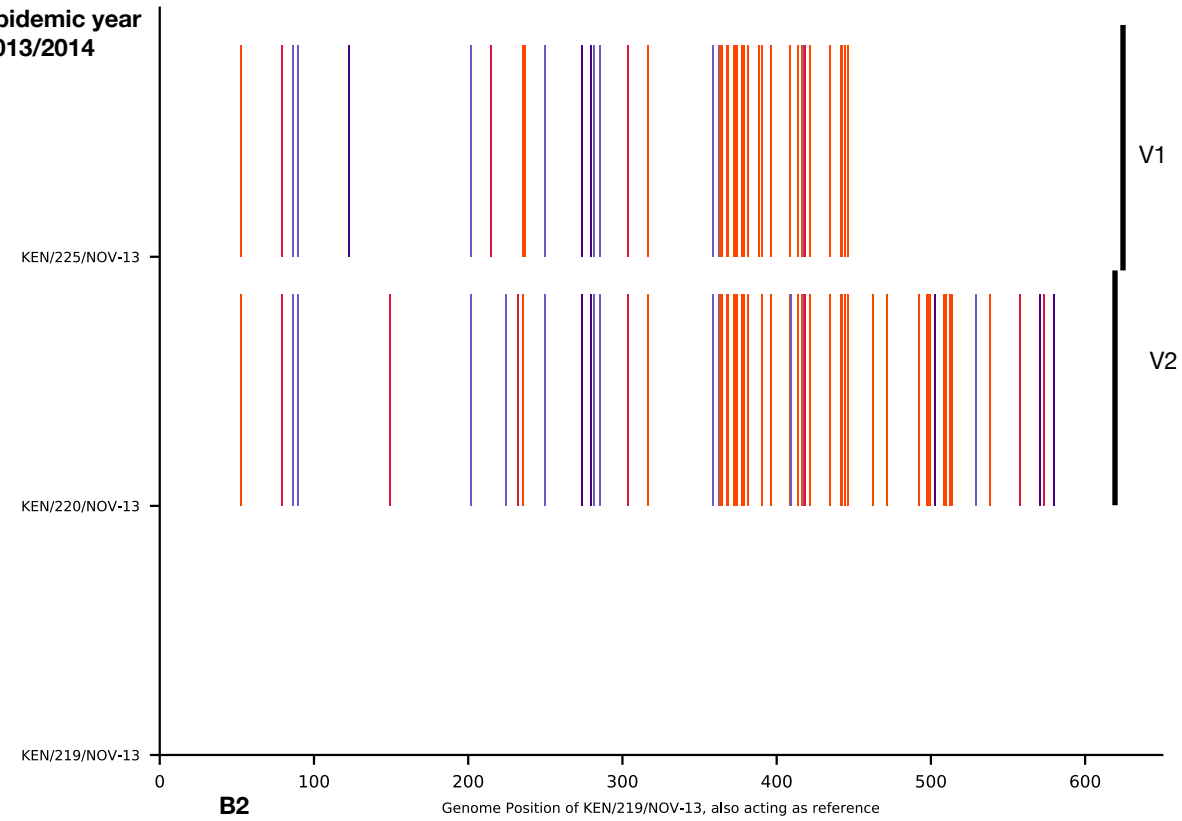

Supplement: 12879_2019_4381_MOESM5_ESM.pdf [file 12879_2019_4381_MOESM5_ESM.pdf]
