# Supplementary material for: Human metapneumovirus prevalence and patterns of subgroup persistence identified through surveillance of pediatric pneumonia hospital admissions in coastal Kenya, 2007–2016
Source: PubMed Central journal article supplement (PMC6716807; doi:10.1186/s12879-019-4381-9), 2019-08-30
Supplement: 12879_2019_4381_MOESM6_ESM.pdf [file 12879_2019_4381_MOESM6_ESM.pdf]

## Parameter estimates,dN/dS ratios,positively selected sites and log likelihood scores for F and G gene nucleotide sequences for Kilifi HMPV genotypes.

|        | Subgroup and Model |     | dN/dS <sup>a</sup> | Parameter estimates                                                              | PSS              | loglikelihood |             |
|--------|--------------------|-----|--------------------|----------------------------------------------------------------------------------|------------------|---------------|-------------|
| F gene | A2c                | M0  | 0.10386            | $\omega=0.10386$                                                                 | none             | -2380.250943  |             |
|        |                    | M1  | 0.0865             | $p_0=0.91, P_1=0.09 ; \{\omega_0=0, \omega_1=1\}$                                | Not allowed      | -2371.8481    |             |
|        |                    | M2  | 0.1129             | $p_0=0.95, P_1=0.00, P_2=0.05 ; \{\omega_0=0, \omega_1=1, \omega_2=2.47\}$       | none             | -2370.568413  |             |
|        |                    | M3  | 0.1128             | $p_0=0.40, P_1=0.56, P_2=0.05 ; \{\omega_0=0, \omega_1=0, \omega_2=2.46\}$       | none             | -2370.568435  |             |
|        | A2b                | M0  | 0.1539             | $\omega=0.15394$                                                                 | none             | -769.367785   |             |
|        |                    | M1  | 0.101              | $p_0=0.89, P_1=0.10 ; \omega_0=0, \omega_1=1$                                    | Not allowed      | -749.78974    |             |
|        |                    | M2  | 0.2566             | $p_0=0.91, P_1=0.06, P_2=0.03 ; \{\omega_0=0, \omega_1=1, \omega_2=\}$           | none             | -744.10291    |             |
|        |                    | M3  | 0.242              | $p_0=0.93, P_1=0.00, P_2=0.07 ; \{\omega_0=0, \omega_1=0, \omega_2=3.40\}$       | none             | -744.551601   |             |
|        | B1                 | M0  | 0.0144             | $\omega=0.01443$                                                                 | none             | -614.044605   |             |
|        |                    | M1  | 0.0144             | $p_0=1.0, P_1=0.00 ; \omega_0=0.01, \omega_1=1$                                  | Not allowed      | -614.044661   |             |
|        |                    | M2  | 0.0144             | $p_0=1.0, P_1=0.00, P_2=0.00 ; \{\omega_0=0.01, \omega_1=1, \omega_2=9.60\}$     | none             | -614.044538   |             |
|        |                    | M3  | 0.0144             | $p_0=0.31, P_1=0.33, P_2=0.35 ; \omega_0=0.01, \omega_1=0.01, \omega_2=0.1$      | none             | -614.044538   |             |
| G gene | B2                 | M0  | 0.1198             | $\omega=0.11980$                                                                 | none             | -717.782054   |             |
|        |                    | M1  | 0.1036             | $p_0=0.90, P_1=0.10 ; \omega_0=0, \omega_1=1$                                    | Not allowed      | -709.823007   |             |
|        |                    | M2  | 0.1418             | $p_0=0.92, P_1=0.00, P_2=0.08 ; \{\omega_0=0, \omega_1=1, \omega_2=1.83\}$       | none             | -709.170371   |             |
|        |                    | M3  | 0.1418             | $p_0=0.67, P_1=0.25, P_2=0.08 ; \omega_0=0, \omega_1=0, \omega_2=1.83$           | none             | -709.170371   |             |
|        |                    | A2c | M0                 | 0.3822                                                                           | $\omega=0.38219$ | none          | -943.348921 |
|        |                    | M1  | 0.4104             | $p_0=0.66, P_1=0.38 ; \{\omega_0=0.05, \omega_1=1\}$                             | Not allowed      | -941.642281   |             |
|        |                    | M2  | 0.4652             | $p_0=0.94, P_1=0.00, P_2=0.06 ; \{\omega_0=0.25, \omega_1=1, \omega_2=3.58\}$    | 17T,24S,28N      | -941.244453   |             |
|        |                    | M3  | 0.4652             | $p_0=0.07, P_1=0.87, P_2=0.06 ; \omega_0=0.25, \omega_1=0.25, \omega_2=3.58\}$   | none             | -941.244453   |             |
|        | A2b                | M0  | 0.56976            | $\omega=0.5698$                                                                  | none             | -2032.157168  |             |
|        |                    | M1  | 0.5014             | $p_0=0.63, P_1=0.36 ; \{\omega_0=0.21, \omega_1=1\}$                             | Not allowed      | -2021.329797  |             |
|        |                    | M2  | 0.8112             | $p_0=0.78, P_1=0.18, P_2=0.04 ; \{\omega_0=0.3, \omega_1=1, \omega_2=8.16\}$     | 87L,123Q,135P    | -2006.200586  |             |
|        |                    | M3  | 0.8052             | $p_0=0.25, P_1=0.71, P_2=0.05 ; \{\omega_0=0.13, \omega_1=0.58, \omega_2=7.92\}$ | none             | -2006.045905  |             |
| G gene | B1                 | M0  | 0.7821             | $\omega=0.78214$                                                                 | none             | -1512.591846  |             |
|        |                    | M1  | 0.6463             | $p_0=0.35, P_1=0.64 ; \omega_0=0, \omega_1=1$                                    | Not allowed      | -1503.175065  |             |
|        |                    | M2  | 1.021              | $p_0=0.39, P_1=0.51, P_2=0.10 ; \omega_0=0.07, \omega_1=1, \omega_2=4.82$        | 96H              | -1497.511713  |             |
|        |                    | M3  | 1.0502             | $p_0=0.62, P_1=0.35, P_2=0.03 ; \omega_0=0.22, \omega_1=1.85, \omega_2=7.92$     | none             | -1497.306571  |             |
|        | B2                 | M0  | 1.20832            | $\omega=1.20832$                                                                 | none             | -1646.028324  |             |
|        |                    | M1  | 0.8094             | $p_0=0.19, P_1=0.80 ; \omega_0=0, \omega_1=1$                                    | Not allowed      | -1642.966656  |             |
|        |                    | M2  | 1.494              | $p_0=0.21, P_1=0.56, P_2=0.23 ; \omega_0=0.07, \omega_1=1, \omega_2=3.95$        | 12T,127I         | -1635.14972   |             |
|        |                    | M3  | 1.52               | $p_0=0.43, P_1=0.50, P_2=0.06 ; \{\omega_0=0.27, \omega_1=1.95, \omega_2=6.87\}$ | none             | -1635.013273  |             |
