# Supplementary material for: Human metapneumovirus prevalence and patterns of subgroup persistence identified through surveillance of pediatric pneumonia hospital admissions in coastal Kenya, 2007–2016
Source: BMC Infect Dis. 2019 Aug 30;19:757. doi: 10.1186/s12879-019-4381-9 (PMC6716807; doi:10.1186/s12879-019-4381-9)

**F\_gene**

**B1**

**B2**

**A2c**

**A2b**

**A2a**

**A1**

▲ RefSeq

▼ Collapsed B1\_global sequences

▼ Collapsed B2\_global sequences

▼ Collapsed A2c\_global sequences

■ Sequences with 180 ntd\_duplication in G gene

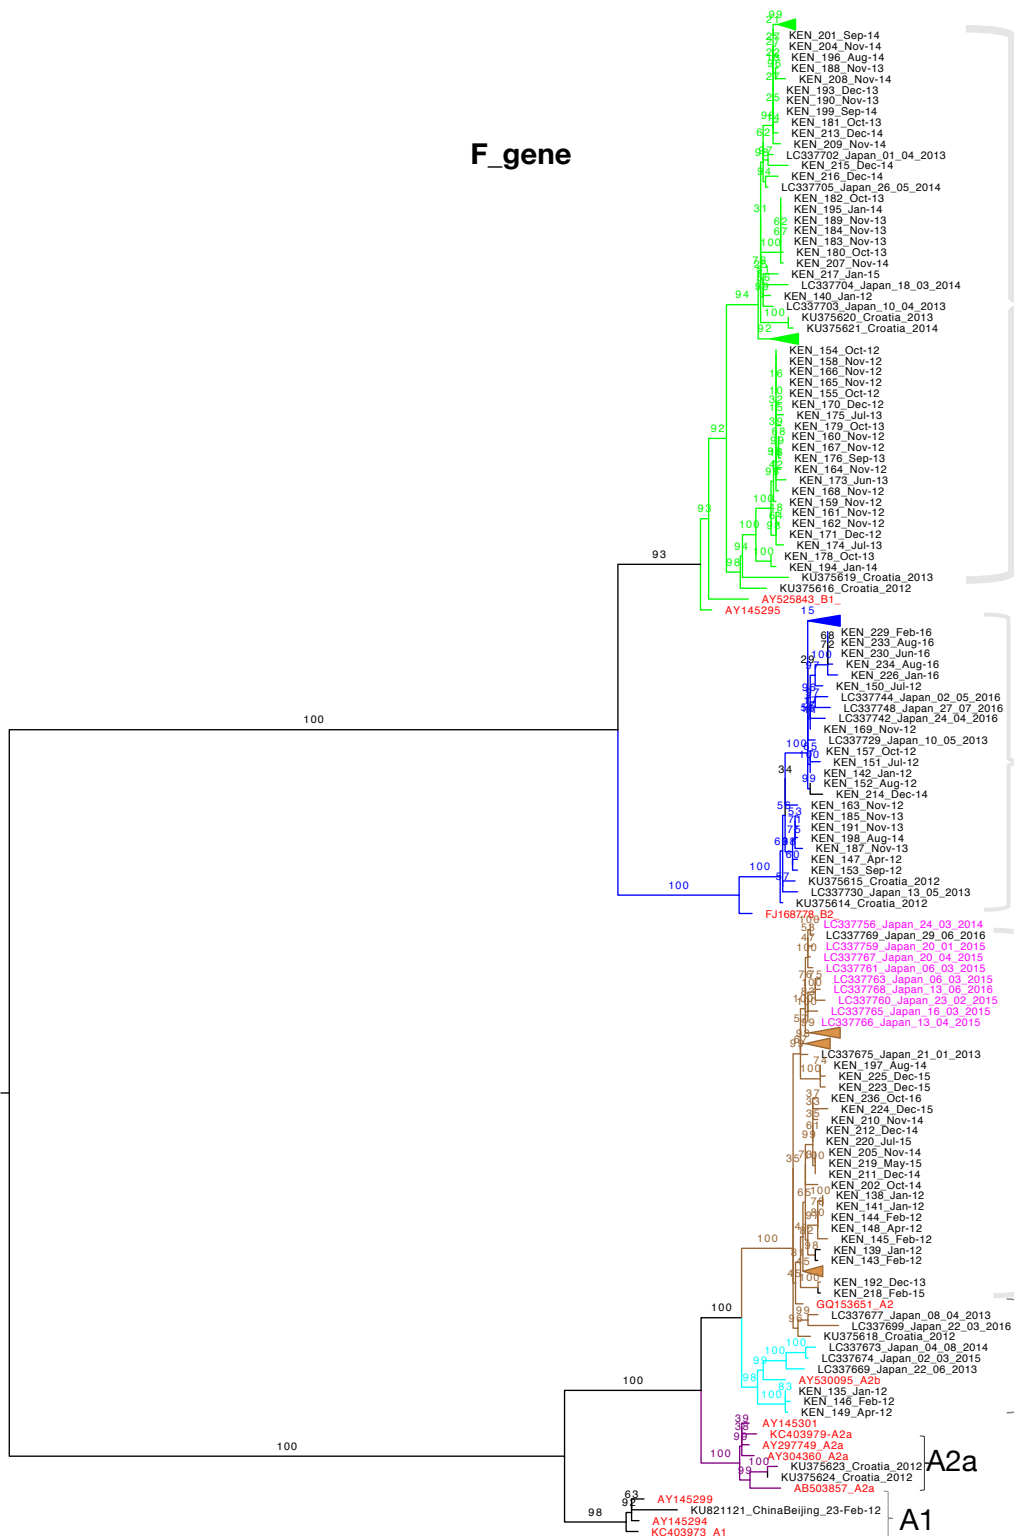

Supplement: Supplementary file 3 — Phylogenetic analysis of Kilifi sequences and sequences retrieved from GenBank constructed using only full F gene sequences (1593 bp) to further asses the clustering of HMPV subgroups. A total 185 full F sequences were used. Sequences were subtyped using references sequences retrieved from GenBank. Reference sequences colored in red. The numbers next to branches indicate the bootstrap values, a branch with > 70% bootstrap value was considered as a major branch. (PDF 44 kb) [file 12879_2019_4381_MOESM3_ESM.pdf]
